# Supplementary figures and images for: Pathways of immune exclusion in metastatic osteosarcoma are associated with inferior patient outcomes
Source: HighWire-hosted journal article supplement (doi:10.1136/jitc-2020-001772), 2021-05-01

Figure S3

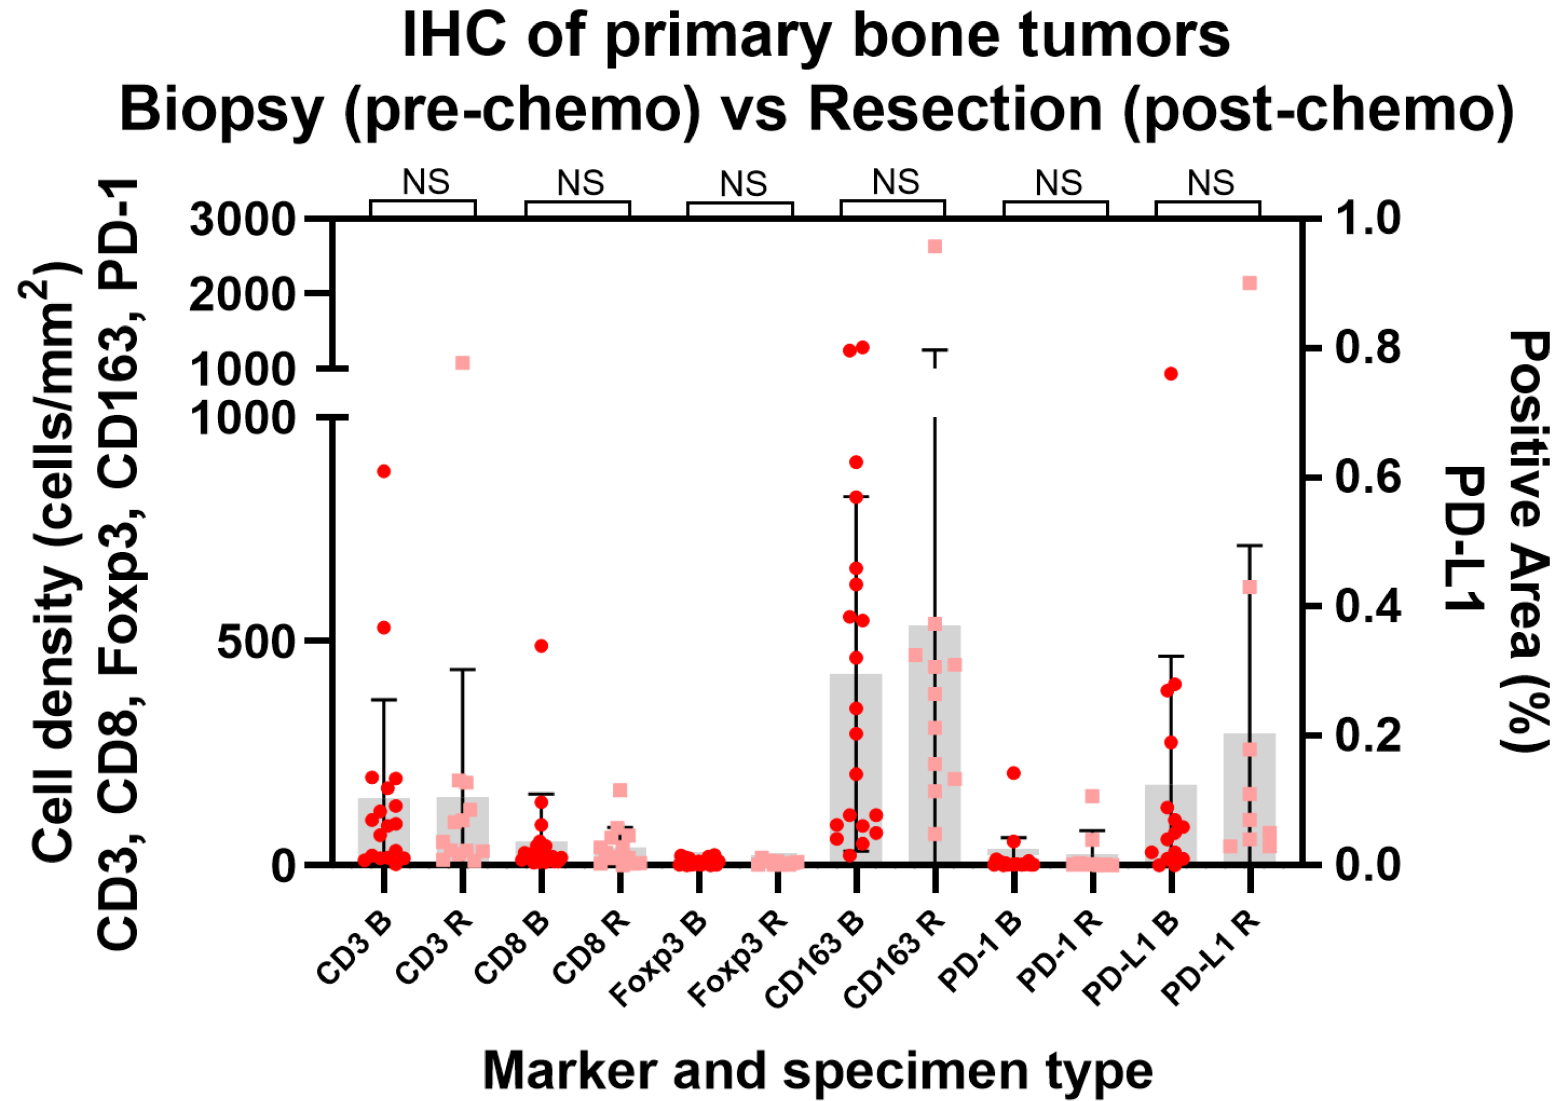

Supplement: jitc-2020-001772supp007_data_supplement.pdf [file jitc-2020-001772supp007_data_supplement.pdf]
